# Supplementary material for: The Effect of Growth Medium Strength on Minimum Inhibitory Concentrations of Tannins and Tannin Extracts against E. coli
Source: PubMed Central journal article supplement (PMC7355419; doi:10.3390/molecules25122947), 2020-06-26
Supplement: molecules-25-02947-s001.pdf [file molecules-25-02947-s001.pdf]

# Molecules

## Supplementary Material

### The Effect of Growth Medium Strength on Minimum Inhibitory Concentrations of Tannins and Tannin Extracts against *E. coli*

Sara Štumpf <sup>1</sup>, Gregor Hostnik <sup>1</sup>, Mateja Primožič <sup>1</sup>, Maja Leitgeb <sup>1,2</sup>, Juha-Pekka Salminen <sup>3</sup> and Urban Bren <sup>1,4,\*</sup>

<sup>1</sup> Faculty of Chemistry and Chemical Technology, University of Maribor, 2000 Maribor, Slovenia; sara.stumpf@um.si (S.Š.); gregor.hostnik@um.si (G.H.); mateja.primozic@um.si (M.P.); maja.leitgeb@um.si (M.L.)

<sup>2</sup> Faculty of Medicine, University of Maribor, 2000 Maribor, Slovenia

<sup>3</sup> Natural Chemistry Research Group, Department of Chemistry, University of Turku, 20014 Turku, Finland; j-p.salminen@utu.fi

<sup>4</sup> Faculty of Mathematics, Natural Sciences and Information Technologies, University of Primorska, 6000 Koper, Slovenia

\* Correspondence: urban.bren@um.si; Tel.: +386-2-2294-421

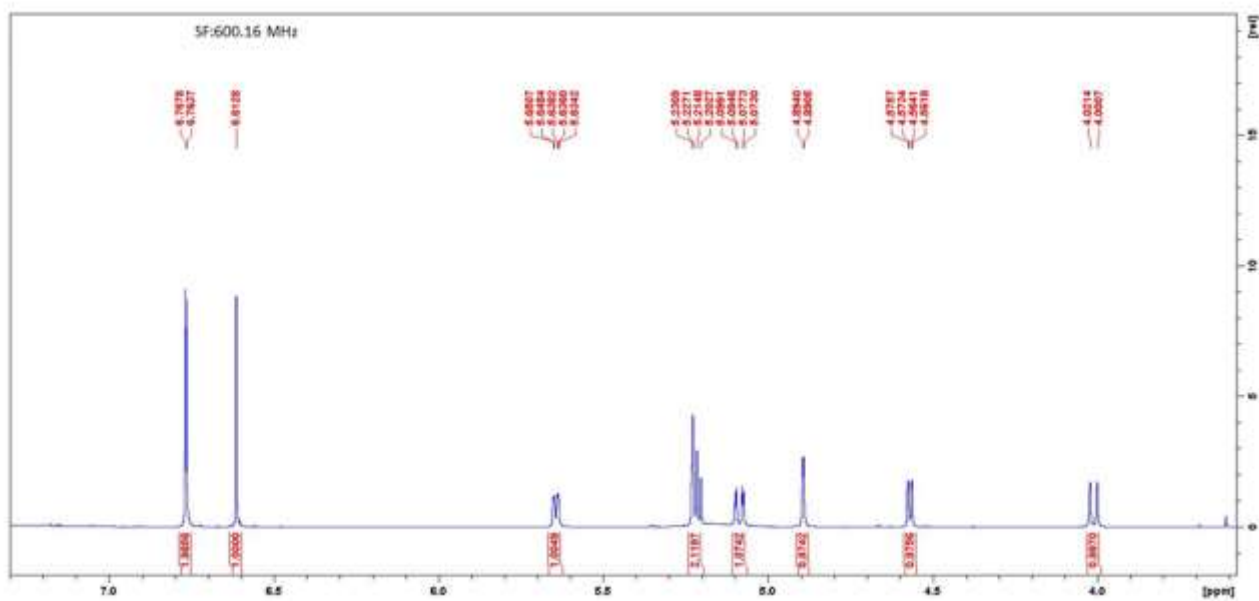

Figure S1. <sup>1</sup>H NMR spectrum of vescalagin.

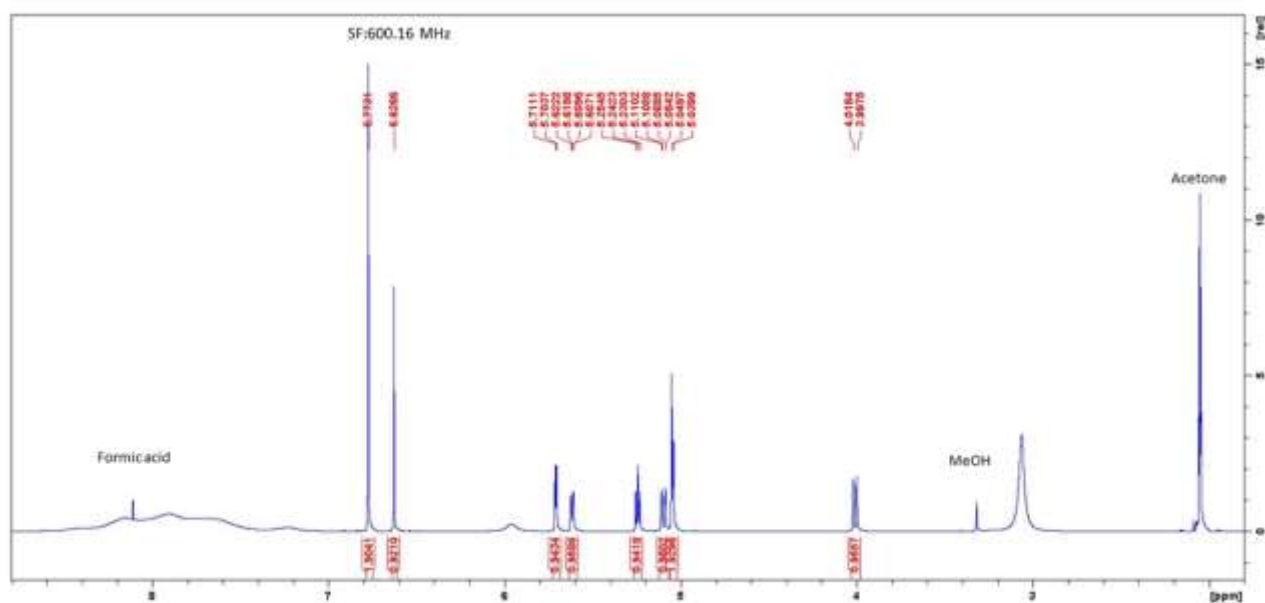

Figure S2. <sup>1</sup>H NMR spectrum of castalagin.

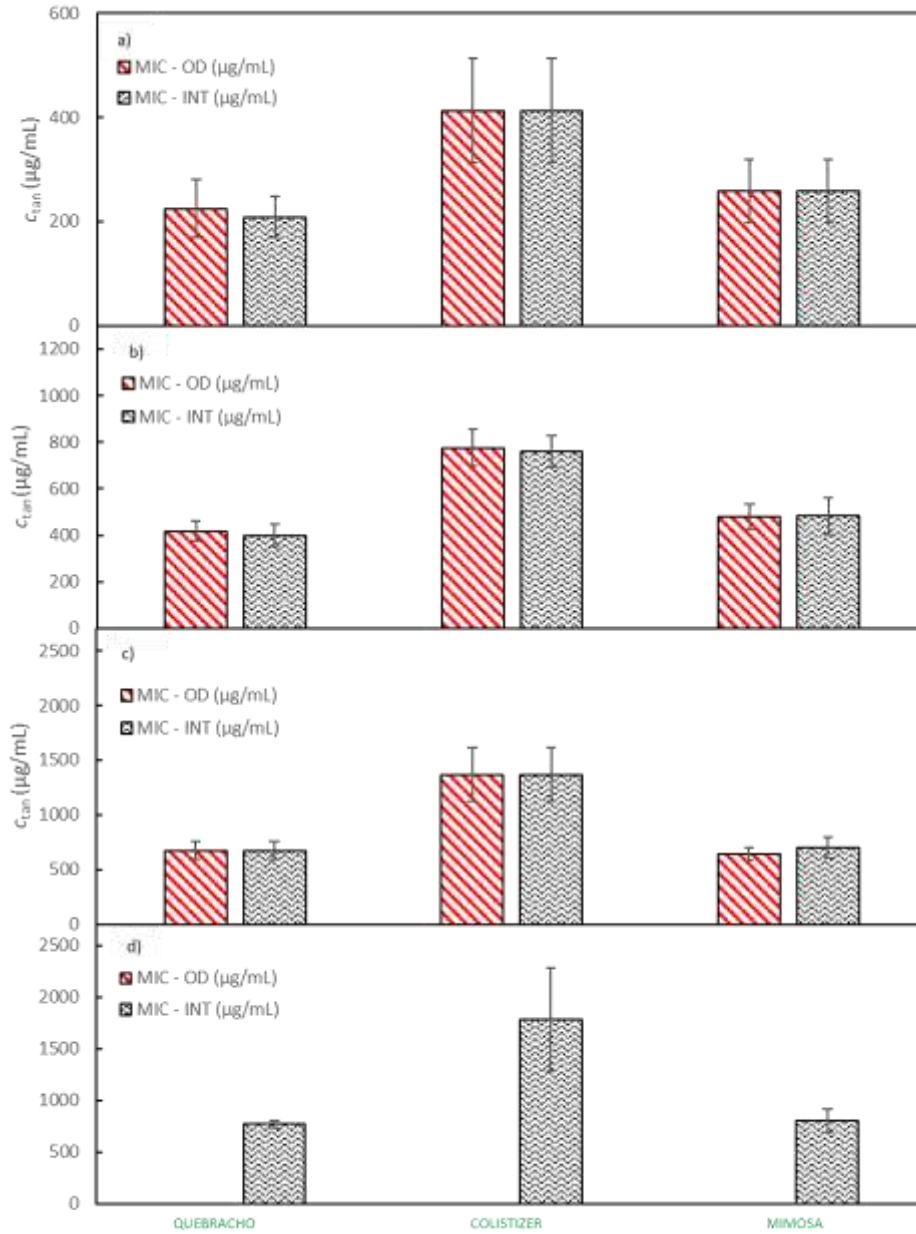

**Figure S3.** A comparison of MIC values for crude commercial extracts of quebracho, mimosa and Colistizer, determined by measurement of the OD and by addition of the INT dye at a) half the concentration of *E. coli* growth medium recommended by the producer, b) the concentration of *E. coli* growth medium recommended by the producer, c) one and a half the concentration of *E. coli* growth medium recommended by the producer and d) double the concentration of *E. coli* growth medium recommended by the producer. Error bars represent 95% confidence interval.

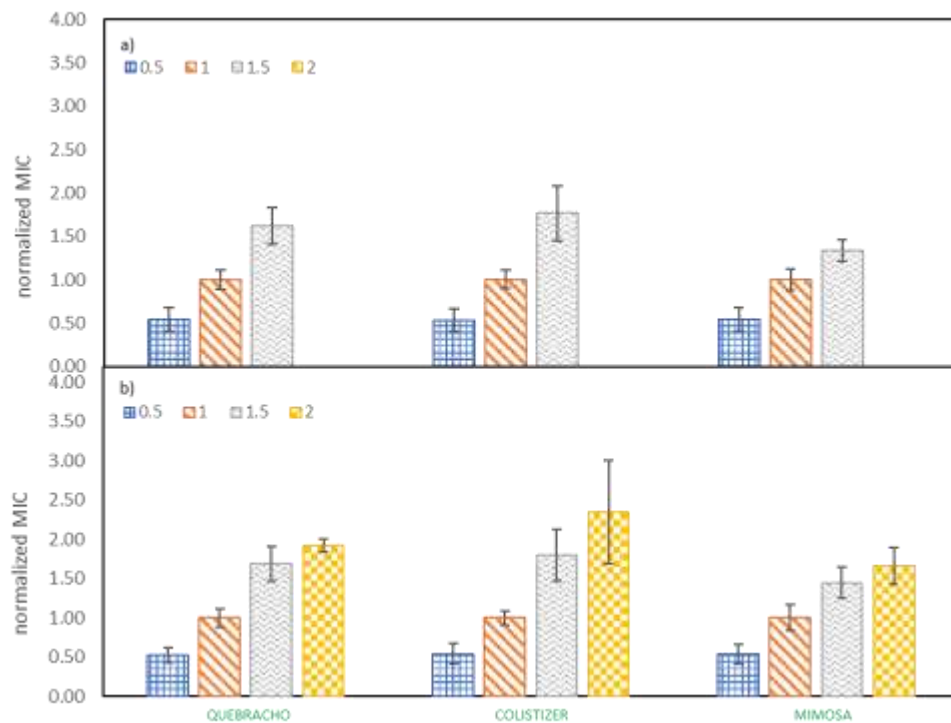

**Figure S4.** Dependence of the normalized MIC on the *E. coli* growth medium concentration for crude commercial extracts of quebracho, mimosa and Colistizer, determined by a) measuring OD and b) using INT dye. MIC values were normalized with respect to the growth medium concentration recommended by the producer.

**Table S1.** Mean values of MICs ( $\mu\text{g/mL}$ ) of tannins in differently concentrated growth media determined by the measurement of OD. A 95% confidence interval is added.

|                   | 0.5 ×<br>concentrated<br>medium | 1 × concentrated<br>medium | 1.5 ×<br>concentrated<br>medium | 2 × concentrated<br>medium |
|-------------------|---------------------------------|----------------------------|---------------------------------|----------------------------|
| Chestnut extract  | 300 ± 33                        | 567 ± 54                   | 975 ± 217                       | /                          |
| Quebracho extract | 225 ± 55                        | 417 ± 43                   | 675 ± 86                        | /                          |
| Colistizer        | 413 ± 100                       | 775 ± 80                   | 1367 ± 245                      | /                          |
| Mimosa extract    | 258 ± 61                        | 480 ± 56                   | 640 ± 57                        | /                          |
| Tannic acid       | 33 ± 35                         | 53 ± 14                    | 120 ± 25                        | 193 ± 29                   |
| Gallic acid       | 567 ± 54                        | 950 ± 163                  | 1667 ± 359                      | 2000 ± 248                 |
| Vescalagin        | 208 ± 21                        | 350 ± 52                   | 533 ± 108                       | 983 ± 46                   |
| Castalagin        | 292 ± 21                        | 442 ± 21                   | 617 ± 79                        | 883 ± 79                   |
| Tetracycline      | 0.29 ± 0.08                     | 0.38 ± 0.03                | 0.47 ± 0.1                      | 0.47 ± 0.06                |

**Table S2.** Mean values of MICs ( $\mu\text{g/mL}$ ) of tannins in differently concentrated growth media determined by the addition of INT dye. A 95% confidence interval is added.

|                   | 0.5 ×<br>concentrated<br>medium | 1 × concentrated<br>medium | 1.5 ×<br>concentrated<br>medium | 2 × concentrated<br>medium |
|-------------------|---------------------------------|----------------------------|---------------------------------|----------------------------|
| Chestnut extract  | 300 ± 33                        | 567 ± 54                   | 975 ± 217                       | 1210 ± 155                 |
| Quebracho extract | 208 ± 39                        | 400 ± 47                   | 675 ± 86                        | 770 ± 34                   |
| Colistizer        | 413 ± 100                       | 760 ± 68                   | 1367 ± 245                      | 1783 ± 502                 |
| Mimosa extract    | 258 ± 61                        | 483 ± 79                   | 700 ± 94                        | 800 ± 113                  |
| Tannic acid       | 32 ± 33                         | 53 ± 14                    | 120 ± 25                        | 200 ± 25                   |
| Gallic acid       | 550 ± 57                        | 900 ± 199                  | 1750 ± 373                      | 2000 ± 248                 |
| Vescalagin        | 217 ± 43                        | 350 ± 52                   | 533 ± 108                       | 933 ± 108                  |
| Castalagin        | 292 ± 21                        | 450 ± 33                   | 617 ± 79                        | 800 ± 66                   |
| Tetracycline      | 0.32 ± 0.06                     | 0.39 ± 0.03                | 0.52 ± 0.05                     | 0.48 ± 0.05                |

**Table S3.** Normalized MICs of tannins in differently concentrated growth medium determined by the measurement of optical density. MIC values were normalized according to the concentration of the growth medium recommended by the producer. A 95% confidence interval is added.

|                   | 0.5 ×<br>concentrated<br>medium | 1 × concentrated<br>medium | 1.5 ×<br>concentrated<br>medium | 2 × concentrated<br>medium |
|-------------------|---------------------------------|----------------------------|---------------------------------|----------------------------|
| Chestnut extract  | 0.53 ± 0.06                     | 1 ± 0.1                    | 1.72 ± 0.38                     | /                          |
| Quebracho extract | 0.54 ± 0.14                     | 1 ± 0.11                   | 1.62 ± 0.21                     | /                          |
| Colistizer        | 0.53 ± 0.13                     | 1 ± 0.11                   | 1.76 ± 0.32                     | /                          |
| Mimosa extract    | 0.54 ± 0.14                     | 1 ± 0.12                   | 1.33 ± 0.12                     | /                          |
| Tannic acid       | 0.63 ± 0.62                     | 1 ± 0.25                   | 2.25 ± 0.47                     | 3.63 ± 0.27                |
| Gallic acid       | 0.60 ± 0.06                     | 1 ± 0.17                   | 1.75 ± 0.38                     | 2.11 ± 0.26                |
| Vescalagin        | 0.60 ± 0.06                     | 1 ± 0.15                   | 1.52 ± 0.31                     | 2.81 ± 0.13                |
| Castalagin        | 0.66 ± 0.05                     | 1 ± 0.05                   | 1.4 ± 0.18                      | 2 ± 0.18                   |
| Tetracycline      | 0.77 ± 0.2                      | 1 ± 0.09                   | 1.23 ± 0.26                     | 1.23 ± 0.17                |

**Table S4.** Normalized MICs of tannins in differently concentrated growth media determined by the addition of the INT dye. MIC values were normalized according to the concentration of the growth medium recommended by the producer. A 95% confidence interval is added.

|                   | 0.5 ×<br>concentrated<br>medium | 1 × concentrated<br>medium | 1.5 ×<br>concentrated<br>medium | 2 × concentrated<br>medium |
|-------------------|---------------------------------|----------------------------|---------------------------------|----------------------------|
| Chestnut extract  | 0.53 ± 0.06                     | 1 ± 0.10                   | 1.72 ± 0.38                     | 2.14 ± 0.27                |
| Quebracho extract | 0.52 ± 0.10                     | 1 ± 0.12                   | 1.69 ± 0.22                     | 1.93 ± 0.09                |
| Colistizer        | 0.54 ± 0.13                     | 1 ± 0.09                   | 1.8 ± 0.32                      | 2.35 ± 0.66                |
| Mimosa extract    | 0.53 ± 0.13                     | 1 ± 0.16                   | 1.45 ± 0.19                     | 1.66 ± 0.23                |
| Tannic acid       | 0.59 ± 0.62                     | 1 ± 0.27                   | 2.25 ± 0.47                     | 3.75 ± 0.23                |
| Gallic acid       | 0.61 ± 0.06                     | 1 ± 0.22                   | 1.94 ± 0.41                     | 2.22 ± 0.28                |
| Vescalagin        | 0.62 ± 0.12                     | 1 ± 0.15                   | 1.52 ± 0.31                     | 2.67 ± 0.31                |
| Castalagin        | 0.65 ± 0.05                     | 1 ± 0.08                   | 1.37 ± 0.18                     | 1.78 ± 0.15                |
| Tetracycline      | 0.82 ± 0.16                     | 1 ± 0.08                   | 1.34 ± 0.12                     | 1.24 ± 0.14                |

**Table S5.** Slope and correlation coefficient of the linear regression curve obtained with the OD method.

|              | slope | R <sup>2</sup> |
|--------------|-------|----------------|
| CHESTNUT     | 1.19  | 0.986          |
| QUEBRACHO    | 1.08  | 0.993          |
| COLISTIZER   | 1.23  | 0.981          |
| MIMOSA       | 0.80  | 0.991          |
| TANNIC ACID  | 2.05  | 0.950          |
| GALLIC ACID  | 1.06  | 0.980          |
| VESCALAGIN   | 1.43  | 0.923          |
| CASTALAGIN   | 0.88  | 0.981          |
| TETRACYCLINE | 0.32  | 0.890          |

**Table S6.** Slope and correlation coefficient of the linear regression curve obtained with the INT method.

|              | slope | R <sup>2</sup> |
|--------------|-------|----------------|
| CHESTNUT     | 1.11  | 0.990          |
| QUEBRACHO    | 0.98  | 0.971          |
| COLISTIZER   | 1.24  | 0.990          |
| MIMOSA       | 0.76  | 0.974          |
| TANNIC ACID  | 2.14  | 0.948          |
| GALLIC ACID  | 1.16  | 0.955          |
| VESCALAGIN   | 1.33  | 0.934          |
| CASTALAGIN   | 0.75  | 0.999          |
| TETRACYCLINE | 0.32  | 0.769          |

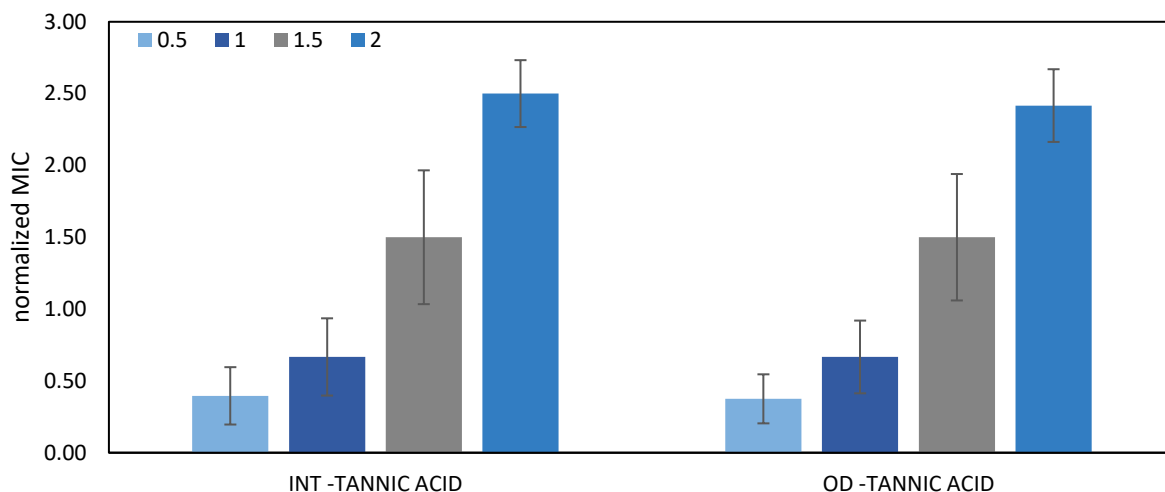

**Figure S5.** Dependence of normalized MIC on the concentration of E. coli growth media, determined by the addition of INT dye and with the OD measurement. MIC values are normalized according to one and a half the concentration of E. coli growth medium recommended by the producer.

**Table S7.** The percentage of tannins in different extracts, determined by *Quantitative analysis of tanning agents by filter method* (International standard ISO 14088) and the content of gallic acid in different extracts.

| <b>extract</b> | <b>Tannin content (%)</b> | <b>Gallic acid content (%)</b> |
|----------------|---------------------------|--------------------------------|
| mimosa         | 72.5                      | 0.03                           |
| quebracho      | 79.8                      | 0.37                           |
| Colistizer     | 74.5                      | 0.27                           |

**Table S8.** Composition of chestnut extract.

| <b>component</b> | <b>content (%)</b> |
|------------------|--------------------|
| vescalin         | 1.0                |
| castalin         | 1.6                |
| roburin A        | 2.0                |
| gallic acid      | 2.5                |
| roburin B/C      | 1.3                |
| grandinin        | 0.5                |
| roburin D        | 1.0                |
| vescalagin       | 6.0                |
| roburin E        | 2.2                |
| castalagin       | 4.1                |
| ellagic acid     | 0.6                |
| water            | 8.1                |
| unidentified     | 69.1               |
